# Supplementary material for: Validity and reliability of inertial sensors for elbow and wrist range of motion assessment
Source: PeerJ. 2020 Aug 11;8:e9687. doi: 10.7717/peerj.9687 (PMC7427560; doi:10.7717/peerj.9687)
Supplement: Supplemental Information 1 [file peerj-08-9687-s001.xlsx]

## Sheet: Instrucciones
Mediciones de Codo
Cada medida se indica con la siguiente secuencia de código: Movimiento_nº de repetición_examinador_instrumento de medición
Cada sujeto y sesión se indica en la primera columna como: nº sujeto_nº de sesión
	Código	Significado
Movimiento	Flex	Flexión
	Supi	Supinación
	Prono	Pronación
nº repetición	1	Primera repetición
	2	Segunda repetición
	3	Tercera repetición
Examinador	A	Examinador Sandra
	B	Examinador Giovanni
Instrumento medición	G	Goniómetro
	S	Sensor

## Sheet: Raw data
Subject_Session ID	Flex_1_A_G	Flex_2_A_G	Flex_3_A_G	Averg_Flex_A_G	Flex_1_A_S	Flex_2_A_S	Flex_3_A_S	Averg_Flex_A_S	Flex_1_B_G	Flex_2_B_G	Flex_3_B_G	Averg_Flex_B_G	Flex_1_B_S	Flex_2_B_S	Flex_3_B_S	Averg_Flex_B_S	Supi_1_A_G	Supi_2_A_G	Supi_3_A_G	Averg_Supi_A_G	Supi_1_A_S	Supi_2_A_S	Supi_3_A_S	Averg_Supi_A_S	Supi_1_B_G	Supi_2_B_G	Supi_3_B_G	Averg_Supi_B_G	Supi_1_B_S	Supi_2_B_S	Supi_3_B_S	Averg_Supi_B_S	Prono_1_A_G	Prono_2_A_G	Prono_3_A_G	Averg_Prono_A_G	Prono_1_A_S	Prono_2_A_S	Prono_3_A_S	Averg_Prono_A_S	Prono_1_B_G	Prono_2_B_G	Prono_3_B_G	Averg_Prono_B_G	Prono_1_B_S	Prono_2_B_S	Prono_3_B_S	Averg_Prono_B_S
1_1	153	152	154	153	152	151	151	151.333	151	149	149	149.667	151	152	151	151.333	40	42	39	40.3333	41	41	40	40.6667	38	37	40	38.3333	40	41	41	40.6667	55	54	54	54.3333	54	55	54	54.3333	62	60	60	60.6667	54	56	54	54.6667
1_2	150	152	150	150.667	150	151	150	150.333	150	146	146	147.333	152	152	150	151.333	36	42	42	40	40	41	40	40.3333	40	38	40	39.3333	41	42	42	41.6667	56	54	56	55.3333	58	55	59	57.3333	46	58	58	54	47	62	56	55
2_1	153	155	152	153.333	158	160	159	159	160	160	162	160.667	160	164	162	162	88	83	83	84.6667	85	83	80	82.6667	80	84	80	81.3333	87	88	89	88	55	53	51	53	52	50	50	50.6667	68	64	60	64	58	57	53	56
2_2	158	158	158	158	150	151	151	150.667	160	162	160	160.667	157	157	157	157	74	73	80	75.6667	72	69	72	71	84	82	82	82.6667	83	85	84	84	60	61	59	60	64	65	65	64.6667	62	60	62	61.3333	65	65	67	65.6667
3_1	158	158	158	158	146	148	148	147.333	142	142	142	142	147	155	145	149	99	99	99	99	78	78	80	78.6667	88	88	90	88.6667	85	86	85	85.3333	99	98	98	98.3333	76	79	76	77	80	84	82	82	67	60	67	64.6667
3_2	158	157	158	157.667	146	144	142	144	154	152	154	153.333	151	148	153	150.667	88	90	92	90	93	95	93	93.6667	92	94	92	92.6667	91	92	94	92.3333	72	70	72	71.3333	68	72	69	69.6667	56	50	52	52.6667	68	66	62	65.3333
4_1	152	152	154	152.667	158	158	153	156.333	156	154	154	154.667	157	161	158	158.667	91	92	93	92	74	70	66	70	94	96	96	95.3333	85	85	84	84.6667	92	90	90	90.6667	63	57	57	59	98	82	82	87.3333	63	63	64	63.3333
4_2	160	158	160	159.333	160	158	165	161	164	164	166	164.667	162	163	163	162.667	80	89	90	86.3333	86	88	86	86.6667	82	78	82	80.6667	83	86	86	85	60	60	59	59.6667	66	60	62	62.6667	58	60	62	60	62	63	66	63.6667
5_1	149	148	148	148.333	145	145	145	145	138	140	140	139.333	151	152	148	150.333	93	88	79	86.6667	74	71	72	72.3333	72	68	68	69.3333	77	74	70	73.6667	52	58	58	56	54	52	58	54.6667	66	64	64	64.6667	55	54	56	55
5_2	145	148	146	146.333	155	158	158	157	158	158	158	158	156	154	155	155	79	80	82	80.3333	81	84	85	83.3333	94	94	94	94	83	84	81	82.6667	68	69	68	68.3333	57	57	57	57	52	44	56	50.6667	57	57	57	57
6_1	150	150	150	150	153	153	151	152.333	160	162	160	160.667	154	157	154	155	70	70	71	70.3333	67	70	69	68.6667	70	68	70	69.3333	72	70	69	70.3333	80	81	80	80.3333	78	80	81	79.6667	86	90	88	88	90	88	90	89.3333
6_2	162	162	162	162	170	169	170	169.667	158	160	160	159.333	175	175	175	175	72	70	72	71.3333	73	75	73	73.6667	74	72	72	72.6667	70	69	70	69.6667	72	74	72	72.6667	77	76	76	76.3333	80	82	80	80.6667	78	83	80	80.3333
7_1	150	150	150	150	155	159	159	157.667	151	152	152	151.667	147	152	151	150	78	78	78	78	74	75	75	74.6667	79	81	82	80.6667	75	74	74	74.3333	71	61	71	67.6667	52	47	43	47.3333	79	78	80	79	54	52	52	52.6667
7_2	151	151	151	151	151	148	152	150.333	154	156	156	155.333	155	160	154	156.333	73	75	73	73.6667	68	70	65	67.6667	90	90	90	90	71	68	65	68	70	62	63	65	56	55	54	55	48	42	40	43.3333	44	44	42	43.3333
8_1	143	151	144	146	145	147	145	145.667	140	138	140	139.333	144	145	144	144.333	54	53	51	52.6667	55	55	52	54	62	58	60	60	56	54	56	55.3333	60	59	58	59	62	59	61	60.6667	58	56	50	54.6667	56	56	53	55
8_2	150	152	152	151.333	158	156	156	156.667	154	156	156	155.333	161	162	160	161	44	42	44	43.3333	48	50	51	49.6667	52	52	52	52	48	50	54	50.6667	64	66	64	64.6667	53	52	60	55	56	54	52	54	58	55	55	56
9_1	144	146	148	146	144	142	143	143	146	146	144	145.333	146	146	146	146	62	64	64	63.3333	67	65	65	65.6667	66	68	68	67.3333	66	65	63	64.6667	66	62	64	64	64	62	62	62.6667	62	60	60	60.6667	60	64	60	61.3333
9_2	152	152	152	152	144	144	144	144	142	144	142	142.667	140	142	142	141.333	62	62	60	61.3333	65	65	65	65	60	60	60	60	62	65	65	64	54	56	56	55.3333	52	52	52	52	52	50	50	50.6667	48	48	46	47.3333
10_1	145	148	148	147	146	146	144	145.333	158	158	158	158	147	144	148	146.333	80	80	80	80	83	83	83	83	72	74	72	72.6667	76	76	76	76	63	62	58	61	58	56	57	57	64	66	68	66	64	64	64	64
10_2	142	145	145	144	145	145	145	145	147	147	145	146.333	146	145	145	145.333	80	75	78	77.6667	80	82	82	81.3333	77	75	75	75.6667	80	80	80	80	63	63	60	62	60	57	60	59	64	60	62	62	60	64	60	61.3333
11_1	150	148	148	148.667	144	143	144	143.667	146	146	146	146	146	146	145	145.667	43	44	42	43	40	39	39	39.3333	44	44	46	44.6667	37	39	39	38.3333	60	60	62	60.6667	57	58	60	58.3333	56	54	54	54.6667	56	54	55	55
11_2	156	154	158	156	156	157	159	157.333	156	156	156	156	156	157	159	157.333	42	44	38	41.3333	40	40	39	39.6667	46	45	42	44.3333	40	40	40	40	62	56	58	58.6667	57	57	56	56.6667	53	52	52	52.3333	56	56	55	55.6667
12_1	139	139	138	138.667	137	137	138	137.333	142	142	142	142	142	141	142	141.667	69	70	71	70	70	71	72	71	74	74	74	74	72	75	74	73.6667	40	38	37	38.3333	36	37	36	36.3333	38	40	42	40	39	39	41	39.6667
12_2	145	144	144	144.333	146	147	146	146.333	140	140	140	140	146	145	146	145.667	62	61	62	61.6667	61	63	64	62.6667	74	74	72	73.3333	66	65	65	65.3333	40	41	40	40.3333	42	41	41	41.3333	42	40	40	40.6667	43	42	43	42.6667
13_1	141	141	130	137.333	139	132	130	133.667	132	130	134	132	129	125	124	126	60	54	54	56	45	46	45	45.3333	68	64	62	64.6667	56	56	55	55.6667	69	70	71	70	60	56	58	58	84	78	88	83.3333	55	56	57	56
13_2	138	139	138	138.333	130	130	132	130.667	124	126	130	126.667	124	126	127	125.667	60	60	60	60	65	57	58	60	84	74	84	80.6667	69	63	61	64.3333	60	60	62	60.6667	46	43	43	44	70	58	58	62	38	40	41	39.6667
14_1	153	151	152	152	150	151	151	150.667	152	150	150	150.667	154	153	149	152	73	75	75	74.3333	75	75	73	74.3333	78	76	78	77.3333	70	70	64	68	63	64	62	63	62	61	61	61.3333	68	68	72	69.3333	65	61	65	63.6667
14_2	153	151	153	152.333	153	154	154	153.667	150	152	152	151.333	154	155	155	154.667	70	70	71	70.3333	71	71	71	71	82	82	80	81.3333	78	78	78	78	72	80	81	77.6667	77	77	76	76.6667	70	72	74	72	70	69	70	69.6667
15_1	145	148	149	147.333	150	151	147	149.333	154	154	154	154	150	151	152	151	78	76	78	77.3333	76	79	77	77.3333	77	78	78	77.6667	76	77	79	77.3333	39	40	42	40.3333	35	37	39	37	40	42	34	38.6667	37	37	35	36.3333
15_2	150	143	147	146.667	146	146	145	145.667	150	148	150	149.333	146	146	151	147.667	85	84	85	84.6667	88	86	86	86.6667	89	84	84	85.6667	89	88	85	87.3333	41	42	42	41.6667	45	43	43	43.6667	44	46	46	45.3333	42	42	42	42
16_1	156	158	154	156	155	155	155	155	160	158	158	158.667	156	155	156	155.667	54	56	56	55.3333	56	57	57	56.6667	56	56	56	56	56	57	58	57	62	60	58	60	60	60	57	59	60	60	62	60.6667	59	60	60	59.6667
16_2	154	150	152	152	156	150	154	153.333	152	152	152	152	152	154	152	152.667	62	64	64	63.3333	62	54	54	56.6667	60	60	58	59.3333	57	60	60	59	74	76	76	75.3333	74	77	77	76	74	76	78	76	60	78	75	71
17_1	140	142	144	142	140	143	141	141.333	135	135	134	134.667	140	136	139	138.333	57	58	58	57.6667	56	54	55	55	54	55	54	54.3333	56	57	57	56.6667	54	54	56	54.6667	54	53	51	52.6667	54	53	51	52.6667	55	55	53	54.3333
17_2	136	138	138	137.333	138	138	138	138	136	136	138	136.667	138	138	138	138	58	56	54	56	58	58	54	56.6667	60	60	60	60	58	57	58	57.6667	58	60	62	60	54	58	57	56.3333	56	58	58	57.3333	56	58	58	57.3333
18_1	139	140	140	139.667	137	140	140	139	142	143	145	143.333	148	145	151	148	66	65	68	66.3333	70	72	73	71.6667	67	65	65	65.6667	65	65	63	64.3333	60	60	60	60	58	58	58	58	62	64	64	63.3333	57	57	57	57
18_2	140	142	145	142.333	137	140	137	138	146	146	145	145.667	146	145	146	145.667	68	68	70	68.6667	72	72	75	73	64	60	65	63	67	67	68	67.3333	62	64	64	63.3333	58	60	60	59.3333	60	60	63	61	55	58	58	57
19_1	148	147	149	148	155	152	153	153.333	150	150	150	150	153	154	154	153.667	75	75	75	75	76	75	72	74.3333	74	75	76	75	73	74	73	73.3333	65	70	68	67.6667	70	71	71	70.6667	72	70	65	69	68	72	72	70.6667
19_2	158	158	158	158	155	160	161	158.667	162	163	168	164.333	162	163	163	162.667	66	68	68	67.3333	70	67	67	68	70	70	68	69.3333	65	65	68	66	80	65	72	72.3333	65	70	69	68	68	70	70	69.3333	72	72	70	71.3333
20_1	162	164	162	162.667	154	155	154	154.333	160	162	162	161.333	152	151	152	151.667	91	93	93	92.3333	91	91	91	91	88	86	88	87.3333	85	91	91	89	66	66	64	65.3333	70	72	70	70.6667	74	74	74	74	71	72	72	71.6667
20_2	158	158	162	159.333	157	152	152	153.667	158	158	160	158.667	152	152	148	150.667	80	78	80	79.3333	80	80	80	80	84	82	80	82	80	84	84	82.6667	72	70	72	71.3333	70	70	70	70	68	66	66	66.6667	68	68	68	68
21_1	166	168	166	166.667	165	163	166	164.667	160	163	162	161.667	163	166	167	165.333	66	64	68	66	70	65	66	67	78	75	72	75	70	70	68	69.3333	50	50	54	51.3333	52	50	52	51.3333	60	55	55	56.6667	53	50	55	52.6667
21_2	158	160	160	159.333	168	161	166	165	160	160	160	160	164	165	170	166.333	65	50	48	54.3333	50	50	51	50.3333	66	70	66	67.3333	60	65	65	63.3333	66	62	60	62.6667	55	53	50	52.6667	58	54	56	56	68	65	60	64.3333
22_1	162	168	158	162.667	162	162	164	162.667	158	160	158	158.667	160	162	165	162.333	68	68	65	67	65	66	62	64.3333	60	72	70	67.3333	65	66	62	64.3333	74	76	76	75.3333	72	73	75	73.3333	72	72	74	72.6667	75	68	67	70
22_2	158	168	168	164.667	166	170	170	168.667	160	162	160	160.667	163	160	160	161	65	62	58	61.6667	60	66	61	62.3333	70	75	80	75	63	70	71	68	78	80	80	79.3333	72	72	76	73.3333	70	74	76	73.3333	68	68	70	68.6667
23_1	150	150	150	150	145	151	155	150.333	156	148	144	149.333	150	148	152	150	56	54	52	54	56	56	58	56.6667	60	60	60	60	58	55	54	55.6667	64	66	70	66.6667	64	64	70	66	62	64	64	63.3333	64	63	64	63.6667
23_2	150	152	152	151.333	145	148	148	147	150	148	148	148.667	146	146	146	146	54	50	52	52	57	55	57	56.3333	62	60	60	60.6667	55	57	55	55.6667	64	62	64	63.3333	64	63	63	63.3333	64	66	66	65.3333	65	63	63	63.6667
24_1	146	145	145	145.333	150	148	149	149	144	146	146	145.333	146	149	149	148	52	50	52	51.3333	53	51	51	51.6667	54	56	58	56	55	55	56	55.3333	62	64	66	64	65	61	62	62.6667	60	62	60	60.6667	59	62	62	61
24_2	138	135	140	137.667	134	133	131	132.667	128	136	128	130.667	131	132	131	131.333	56	58	54	56	57	56	54	55.6667	50	54	56	53.3333	57	54	61	57.3333	58	62	58	59.3333	58	57	47	54	50	52	52	51.3333	46	52	52	50
25_1	152	150	150	150.667	147	147	147	147	154	150	150	151.333	147	147	147	147	54	56	54	54.6667	55	55	56	55.3333	54	54	54	54	56	57	57	56.6667	70	66	68	68	67	70	70	69	67	64	64	65	67	67	68	67.3333
25_2	148	148	148	148	145	147	147	146.333	147	148	148	147.667	147	146	147	146.667	54	52	56	54	55	56	55	55.3333	58	58	56	57.3333	55	58	58	57	64	66	68	66	65	66	68	66.3333	68	68	66	67.3333	68	68	68	68
26_1	152	152	154	152.667	147	152	152	150.333	152	154	152	152.667	150	148	150	149.333	58	58	56	57.3333	60	60	60	60	60	60	60	60	57	56	58	57	57	58	59	58	58	57	57	57.3333	58	58	60	58.6667	57	57	57	57
26_2	152	154	156	154	153	152	152	152.333	154	154	152	153.333	151	152	151	151.333	62	60	62	61.3333	62	64	62	62.6667	62	64	64	63.3333	65	64	63	64	63	66	64	64.3333	60	65	56	60.3333	60	62	62	61.3333	62	65	67	64.6667
27_1	150	152	152	151.333	147	148	148	147.667	152	150	148	150	148	147	148	147.667	78	75	74	75.6667	78	78	75	77	78	79	77	78	78	78	76	77.3333	76	78	78	77.3333	76	75	78	76.3333	80	66	80	75.3333	74	76	76	75.3333
27_2	152	154	154	153.333	155	155	155	155	150	152	152	151.333	155	152	152	153	82	82	84	82.6667	80	82	82	81.3333	86	84	86	85.3333	80	80	82	80.6667	84	84	86	84.6667	90	84	86	86.6667	74	76	74	74.6667	76	74	74	74.6667
28_1	144	146	146	145.333	143	142	142	142.333	142	142	144	142.667	142	143	142	142.333	67	66	68	67	69	66	68	67.6667	68	70	72	70	68	68	67	67.6667	68	64	66	66	63	63	64	63.3333	60	62	60	60.6667	59	64	64	62.3333
28_2	146	148	143	145.667	143	140	140	141	144	146	146	145.333	142	142	146	143.333	62	58	60	60	63	62	63	62.6667	60	64	66	63.3333	60	62	62	61.3333	68	66	72	68.6667	58	58	64	60	62	62	62	62	58	59	60	59
29_1	150	154	152	152	147	150	149	148.667	156	156	158	156.667	152	150	153	151.667	74	76	78	76	74	74	75	74.3333	78	76	76	76.6667	74	72	74	73.3333	62	60	60	60.6667	63	64	65	64	62	62	62	62	68	65	65	66
29_2	144	146	148	146	144	146	149	146.333	146	146	146	146	146	153	146	148.333	72	74	76	74	72	72	72	72	67	66	62	65	66	68	68	67.3333	62	62	62	62	62	62	65	63	63	65	60	62.6667	68	65	62	65

## Sheet: Análisis 0
	Fiabilidad intra observador. Consiste en observar el mismo hecho por la misma persona en un momento diferente. Evidentemente la concordancia debería ser muy alta (95-100%).
	Fiabilidad inter observador. Consiste en observar el mismo hecho por dos observadores diferentes. Para que el nivel de fiabilidad sea aceptable, los dos observadores deberían coincidir en más de un 80% de los hallazgos.
SESION 1	Media_Flex_A_G	Media_Flex_A_S	DIF (G/S) A	Media_Flex_B_G	Media_Flex_B_S	DIF (G/S) B	DIF (G) A/B	DIF (S) A/B	Media_Supi_A_G	Media_Supi_A_S	DIF (G/S) A	Media_Supi_B_G	Media_Supi_B_S	DIF (G/S) B	DIF (G) A/B	DIF (S) A/B	Media_Prono_A_G	Media_Prono_A_S	DIF (G/S) A	Media_Prono_B_G	Media_Prono_B_S	DIF (G/S) B	DIF (G) A/B	DIF (S) A/B
1
2	153.333	159	5.66667	160.667	162	1.33333	7.33333	3	84.6667	82.6667	2	81.3333	88	6.66667	3.33333	5.33333	53	50.6667	2.33333	64	56	8	11	5.33333
3	158	147.333	10.6667	142	149	7	16	1.66667	99	78.6667	20.3333	88.6667	85.3333	3.33333	10.3333	6.66667	98.3333	77	21.3333	82	64.6667	17.3333	16.3333	12.3333
4	152.667	156.333	3.66667	154.667	158.667	4	2	2.33333	92	70	22	95.3333	84.6667	10.6667	3.33333	14.6667	90.6667	59	31.6667	87.3333	63.3333	24	3.33333	4.33333
5	148.333	145	3.33333	139.333	150.333	11	9	5.33333	86.6667	72.3333	14.3333	69.3333	73.6667	4.33333	17.3333	1.33333	56	54.6667	1.33333	64.6667	55	9.66667	8.66667	0.333333
6
7	150	157.667	7.66667	151.667	150	1.66667	1.66667	7.66667	78	74.6667	3.33333	80.6667	74.3333	6.33333	2.66667	0.333333	67.6667	47.3333	20.3333	79	52.6667	26.3333	11.3333	5.33333
8
9
10
11
12	138.667	137.333	1.33333	142	141.667	0.333333	3.33333	4.33333	70	71	1	74	73.6667	0.333333	4	2.66667	38.3333	36.3333	2	40	39.6667	0.333333	1.66667	3.33333
13
14	137.333	133.667	3.66667	132	126	6	5.33333	7.66667	56	45.3333	10.6667	64.6667	55.6667	9	8.66667	10.3333	70	58	12	83.3333	56	27.3333	13.3333	2
15	152	150.667	1.33333	150.667	152	1.33333	1.33333	1.33333	74.3333	74.3333	0	77.3333	68	9.33333	3	6.33333	63	61.3333	1.66667	69.3333	63.6667	5.66667	6.33333	2.33333
16	147.333	149.333	2	154	151	3	6.66667	1.66667	77.3333	77.3333	0	77.6667	77.3333	0.333333	0.333333	0	40.3333	37	3.33333	38.6667	36.3333	2.33333	1.66667	0.666667
17
18
19
20
		Flexión A	Flexión B	Supi A	Supi B	Prono A	Prono B
Fiabilidad G/S	Coef r Pearson	0.772216	0.865134	0.710082	0.796152	0.872011	0.867098	Mismo examinador comparación G/S sesión 1
	R2	0.596318	0.748456	0.504217	0.633858	0.760403	0.751858
Fiabilidad G/S	Coef r Pearson	0.621679	0.962826	0.965308	0.498108	0.821008	0.644114	Mismo examinador comparación G/S sesión 2
	R2	0.386485	0.927034	0.931819	0.248112	0.674055	0.414883
Fiabilidad Intra G	Coef r Pearson	0.903976	0.714621	0.891323	0.0883658	0.612949	0.493855	Mismo examinador en dos sesiones distintas con G
	R2	0.817172	0.510683	0.794457	0.00780852	0.375706	0.243893
Fiabilidad Intra S	Coef r Pearson	0.666147	0.9348	0.496253	0.723898	0.719697	0.752397	Mismo examinador en dos sesiones distintas con S
	R2	0.443752	0.87385	0.246267	0.524029	0.517963	0.566101
		Flexión	Supinación	Pronación
Fiabilidad Inter G	Coef r Pearson	0.566484	0.769463	0.88599	Distinto examinador SESION 1 con G
	R2	0.320904	0.592074	0.784978
Fiabilidad Inter S	Coef r Pearson	0.887287	0.819253	0.905013	Distinto examinador SESION 1 con S
	R2	0.787279	0.671176	0.819048
Fiabilidad Inter G	Coef r Pearson	0.839155	0.625497	0.621904	Distinto examinador SESION 2 con G
	R2	0.704181	0.391246	0.386764
Fiabilidad Inter S	Coef r Pearson	0.932952	0.918407	0.936056	Distinto examinador SESION 2 con S
	R2	0.870399	0.843471	0.8762
SESION 2	Media_Flex_A_G	Media_Flex_A_S	DIF (G/S) A	Media_Flex_B_G	Media_Flex_B_S	DIF (G/S) B	DIF (G) A/B	DIF (S) A/B	Media_Supi_A_G	Media_Supi_A_S	DIF (G/S) A	Media_Supi_B_G	Media_Supi_B_S	DIF (G/S) B	DIF (G) A/B	DIF (S) A/B	Media_Prono_A_G	Media_Prono_A_S	DIF (G/S) A	Media_Prono_B_G	Media_Prono_B_S	DIF (G/S) B	DIF (G) A/B	DIF (S) A/B
1
2	158	150.667	7.33333	160.667	157	3.66667	2.66667	6.33333	75.6667	71	4.66667	82.6667	84	1.33333	7	13	60	64.6667	4.66667	61.3333	65.6667	4.33333	1.33333	1
3	157.667	144	13.6667	153.333	150.667	2.66667	4.33333	6.66667	90	93.6667	3.66667	92.6667	92.3333	0.333333	2.66667	1.33333	71.3333	69.6667	1.66667	52.6667	65.3333	12.6667	18.6667	4.33333
4	159.333	161	1.66667	164.667	162.667	2	5.33333	1.66667	86.3333	86.6667	0.333333	80.6667	85	4.33333	5.66667	1.66667	59.6667	62.6667	3	60	63.6667	3.66667	0.333333	1
5	146.333	157	10.6667	158	155	3	11.6667	2	80.3333	83.3333	3	94	82.6667	11.3333	13.6667	0.666667	68.3333	57	11.3333	50.6667	57	6.33333	17.6667	0
6
7	151	150.333	0.666667	155.333	156.333	1	4.33333	6	73.6667	67.6667	6	90	68	22	16.3333	0.333333	65	55	10	43.3333	43.3333	0	21.6667	11.6667
8
9
10
11
12	144.333	146.333	2	140	145.667	5.66667	4.33333	0.666667	61.6667	62.6667	1	73.3333	65.3333	8	11.6667	2.66667	40.3333	41.3333	1	40.6667	42.6667	2	0.333333	1.33333
13
14	138.333	130.667	7.66667	126.667	125.667	1	11.6667	5	60	60	0	80.6667	64.3333	16.3333	20.6667	4.33333	60.6667	44	16.6667	62	39.6667	22.3333	1.33333	4.33333
15	152.333	153.667	1.33333	151.333	154.667	3.33333	1	1	70.3333	71	0.666667	81.3333	78	3.33333	11	7	77.6667	76.6667	1	72	69.6667	2.33333	5.66667	7
16	146.667	145.667	1	149.333	147.667	1.66667	2.66667	2	84.6667	86.6667	2	85.6667	87.3333	1.66667	1	0.666667	41.6667	43.6667	2	45.3333	42	3.33333	3.66667	1.66667
17
18
19
20
