# Supplementary material for: Validity and reliability of inertial sensors for elbow and wrist range of motion assessment
Source: PeerJ. 2020 Aug 11;8:e9687. doi: 10.7717/peerj.9687 (PMC7427560; doi:10.7717/peerj.9687)
Supplement: Supplemental Information 2 [file peerj-08-9687-s002.xlsx]

## Sheet: Instrucciones
Mediciones de Muñeca
Cada medida se indica con la siguiente secuencia de código: Movimiento_nº de repetición_examinador_instrumento de medición
Cada sujeto y sesión se indica en la primera columna como: nº sujeto_nº de sesión
	Código	Significado
Movimiento	Flex	Flexión
	Ext	Extensión
	Desvrad	Desviación radial
	Desvcub	Desviación cubital
nº repetición	1	Primera repetición
	2	Segunda repetición
	3	Tercera repetición
Examinador	A	Examinador Sandra
	B	Examinador Giovanni
Instrumento medición	G	Goniómetro
	S	Sensor

## Sheet: Raw data
Subject_Session ID	Flex_1_A_G	Flex_2_A_G	Flex_3_A_G	Media_Flex_A_G	Flex_1_A_S	Flex_2_A_S	Flex_3_A_S	Media_Flex_A_S	Flex_1_B_G	Flex_2_B_G	Flex_3_B_G	Media_Flex_B_G	Flex_1_B_S	Flex_2_B_S	Flex_3_B_S	Media_Flex_B_S	Ext_1_A_G	Ext_2_A_G	Ext_3_A_G	Media_Ext_A_G	Ext_1_A_S	Ext_2_A_S	Ext_3_A_S	Media_Ext_A_S	Ext_1_B_G	Ext_2_B_G	Ext_3_B_G	Media_Ext_B_G	Ext_1_B_S	Ext_2_B_S	Ext_3_B_S	Media_Ext_B_S	Desvrad_1_A_G	Desvrad_2_A_G	Desvrad_3_A_G	Media_Desvrad_A_G	Desvrad_1_A_S	Desvrad_2_A_S	Desvrad_3_A_S	Media_Desvrad_A_S	Desvrad_1_B_G	Desvrad_2_B_G	Desvrad_3_B_G	Media_Desvrad_B_G	Desvrad_1_B_S	Desvrad_2_B_S	Desvrad_3_B_S	Media_Desvrad_B_S	Desvcub_1_A_G
1_1	60	64	68	64	68	70	70	69.3333	70	70	72	70.6667	72	73	72	72.3333	68	64	64	65.3333	67	64	64	65	58	56	56	56.6667	63	60	60	61	24	26	24	24.6667	25	24	26	25	32	30	30	30.6667	23	28	30	27	50
1_2	70	72	76	72.6667	72	76	78	75.3333	70	68	72	70	72	72	74	72.6667	64	62	64	63.3333	60	60	59	59.6667	60	60	60	60	63	61	60	61.3333	28	30	30	29.3333	24	26	26	25.3333	30	30	30	30	30	30	30	30	42
2_1	78	76	78	77.3333	77	77	78	77.3333	74	74	72	73.3333	73	75	77	75	70	70	70	70	68	71	68	69	66	54	62	60.6667	55	56	55	55.3333	16	18	20	18	21	23	23	22.3333	22	22	22	22	25	25	30	26.6667	26
2_2	80	80	82	80.6667	76	78	83	79	74	78	78	76.6667	83	84	76	81	60	58	58	58.6667	60	58	58	58.6667	54	55	56	55	50	55	55	53.3333	23	22	24	23	26	28	26	26.6667	24	22	22	22.6667	27	23	25	25	36
3_1	90	88	90	89.3333	90	86	80	85.3333	86	88	86	86.6667	86	90	86	87.3333	65	62	60	62.3333	67	68	66	67	64	64	66	64.6667	70	64	68	67.3333	38	42	40	40	38	38	38	38	32	32	32	32	38	38	36	37.3333	40
3_2	91	89	89	89.6667	90	89	88	89	86	90	90	88.6667	87	87	90	88	66	64	68	66	70	72	71	71	68	64	64	65.3333	72	71	72	71.6667	36	38	40	38	36	38	40	38	38	38	38	38	39	38	36	37.6667	50
4_1	82	85	81	82.6667	78	80	80	79.3333	82	86	86	84.6667	85	83	83	83.6667	88	88	88	88	86	86	85	85.6667	82	82	84	82.6667	84	85	85	84.6667	30	28	30	29.3333	25	28	28	27	24	30	32	28.6667	28	27	35	30	56
4_2	90	88	90	89.3333	88	90	90	89.3333	90	88	90	89.3333	90	91	90	90.3333	88	88	88	88	86	86	86	86	82	80	86	82.6667	87	89	89	88.3333	34	36	32	34	31	31	33	31.6667	30	28	30	29.3333	30	25	30	28.3333	56
5_1	74	80	78	77.3333	78	78	75	77	78	78	78	78	80	80	78	79.3333	64	66	66	65.3333	66	65	66	65.6667	68	70	68	68.6667	66	71	70	69	24	24	24	24	25	28	22	25	20	20	20	20	22	23	24	23	40
5_2	86	84	86	85.3333	86	87	86	86.3333	82	82	82	82	87	86	86	86.3333	64	62	62	62.6667	59	59	58	58.6667	62	63	60	61.6667	57	56	57	56.6667	26	28	24	26	26	28	27	27	22	22	22	22	24	25	25	24.6667	48
6_1	90	90	92	90.6667	96	94	96	95.3333	90	92	94	92	95	93	96	94.6667	72	74	74	73.3333	74	71	73	72.6667	78	75	78	77	70	72	75	72.3333	28	30	36	31.3333	34	35	42	37	30	32	36	32.6667	34	40	42	38.6667	46
6_2	80	82	90	84	85	85	90	86.6667	86	82	90	86	85	85	92	87.3333	78	80	76	78	76	77	76	76.3333	70	70	70	70	73	71	70	71.3333	40	42	40	40.6667	35	37	36	36	38	40	38	38.6667	33	37	36	35.3333	56
7_1	64	64	70	66	67	67	69	67.6667	60	72	80	70.6667	79	78	79	78.6667	68	63	65	65.3333	63	64	64	63.6667	54	56	56	55.3333	54	57	57	56	30	30	31	30.3333	30	28	30	29.3333	30	30	32	30.6667	30	30	30	30	40
7_2	70	70	72	70.6667	66	65	66	65.6667	60	64	66	63.3333	60	64	64	62.6667	60	58	60	59.3333	64	62	57	61	62	60	60	60.6667	56	54	55	55	30	25	30	28.3333	26	28	27	27	30	30	30	30	27	30	27	28	30
8_1	97	97	96	96.6667	99	98	95	97.3333	92	92	92	92	93	90	95	92.6667	66	62	64	64	65	63	64	64	64	64	64	64	67	64	64	65	26	24	32	27.3333	29	24	27	26.6667	28	28	28	28	25	25	23	24.3333	44
8_2	94	94	95	94.3333	90	94	95	93	90	90	84	88	87	94	90	90.3333	66	68	70	68	68	67	75	70	76	72	74	74	72	70	70	70.6667	24	26	30	26.6667	21	27	23	23.6667	20	26	18	21.3333	20	20	21	20.3333	44
9_1	82	88	86	85.3333	82	87	85	84.6667	80	84	84	82.6667	80	83	83	82	62	64	66	64	65	60	60	61.6667	62	64	64	63.3333	65	65	62	64	32	30	30	30.6667	30	30	30	30	32	32	32	32	31	31	32	31.3333	38
9_2	76	78	80	78	76	78	78	77.3333	82	80	82	81.3333	80	80	80	80	72	70	72	71.3333	65	70	70	68.3333	62	62	64	62.6667	65	64	63	64	32	34	32	32.6667	30	30	30	30	36	32	32	33.3333	30	30	29	29.6667	40
10_1	87	86	87	86.6667	93	93	93	93	89	90	90	89.6667	95	94	94	94.3333	60	58	56	58	60	58	56	58	60	60	62	60.6667	60	61	61	60.6667	28	28	28	28	30	30	30	30	28	28	28	28	30	30	30	30	46
10_2	85	86	88	86.3333	93	93	92	92.6667	88	90	88	88.6667	93	97	94	94.6667	62	64	65	63.6667	60	60	60	60	64	62	62	62.6667	65	63	64	64	38	40	40	39.3333	39	38	38	38.3333	37	32	34	34.3333	35	35	35	35	48
11_1	90	86	90	88.6667	89	88	90	89	86	86	86	86	90	89	90	89.6667	86	86	82	84.6667	81	81	85	82.3333	90	82	82	84.6667	80	80	90	83.3333	24	24	26	24.6667	20	22	24	22	28	28	28	28	28	27	27	27.3333	34
11_2	88	90	90	89.3333	89	88	88	88.3333	86	84	86	85.3333	90	90	90	90	90	88	90	89.3333	83	86	88	85.6667	88	86	86	86.6667	81	82	83	82	24	26	24	24.6667	20	20	20	20	22	24	24	23.3333	21	23	24	22.6667	36
12_1	66	64	64	64.6667	68	63	64	65	58	64	62	61.3333	63	64	63	63.3333	56	56	58	56.6667	55	56	62	57.6667	54	54	56	54.6667	56	56	57	56.3333	36	36	36	36	35	35	35	35	34	32	34	33.3333	30	33	31	31.3333	36
12_2	70	70	72	70.6667	69	70	72	70.3333	60	60	65	61.6667	62	66	67	65	54	52	55	53.6667	50	55	55	53.3333	48	50	52	50	52	53	53	52.6667	32	40	40	37.3333	31	37	33	33.6667	32	32	34	32.6667	32	32	32	32	32
13_1	61	59	60	60	55	53	55	54.3333	54	56	60	56.6667	55	55	54	54.6667	53	50	51	51.3333	54	53	52	53	48	44	44	45.3333	53	50	53	52	13	13	13	13	16	16	16	16	18	18	18	18	20	20	19	19.6667	32
13_2	52	55	52	53	55	57	57	56.3333	60	62	58	60	55	57	55	55.6667	50	48	50	49.3333	55	55	52	54	46	52	48	48.6667	55	57	53	55	20	18	18	18.6667	18	20	22	20	16	16	16	16	21	20	20	20.3333	32
14_1	80	86	84	83.3333	84	82	82	82.6667	86	86	84	85.3333	83	86	83	84	66	66	64	65.3333	65	64	64	64.3333	66	66	66	66	68	64	68	66.6667	30	28	32	30	27	27	28	27.3333	30	34	34	32.6667	28	28	30	28.6667	46
14_2	84	86	86	85.3333	86	86	87	86.3333	78	82	82	80.6667	86	80	88	84.6667	80	76	76	77.3333	84	76	78	79.3333	80	74	72	75.3333	83	80	82	81.6667	32	34	36	34	26	34	34	31.3333	38	38	38	38	33	36	37	35.3333	48
15_1	78	80	82	80	81	84	87	84	88	92	90	90	82	87	85	84.6667	62	58	64	61.3333	67	63	67	65.6667	54	60	62	58.6667	67	68	67	67.3333	18	18	16	17.3333	15	16	15	15.3333	22	22	22	22	18	15	16	16.3333	32
15_2	80	82	82	81.3333	84	84	86	84.6667	80	75	82	79	80	85	85	83.3333	70	68	68	68.6667	68	73	72	71	62	60	64	62	65	68	70	67.6667	20	20	20	20	22	22	23	22.3333	18	18	18	18	17	17	20	18	40
16_1	86	92	90	89.3333	90	90	90	90	90	90	92	90.6667	90	92	92	91.3333	58	59	62	59.6667	60	60	59	59.6667	58	64	64	62	60	59	59	59.3333	16	18	18	17.3333	18	16	16	16.6667	15	18	18	17	17	18	16	17	44
16_2	90	94	96	93.3333	90	90	90	90	88	90	92	90	90	90	90	90	62	54	62	59.3333	57	60	58	58.3333	64	62	62	62.6667	57	57	56	56.6667	18	19	16	17.6667	19	19	18	18.6667	16	18		17	17	17	17	17	36
17_1	84	84	86	84.6667	86	88	84	86	84	88	84	85.3333	86	84	83	84.3333	58	54	60	57.3333	55	55	57	55.6667	50	54	56	53.3333	54	56	54	54.6667	16	14	18	16	18	14	14	15.3333	14	14	14	14	15	14	15	14.6667	44
17_2	82	80	82	81.3333	82	82	83	82.3333	78	78	80	78.6667	86	82	82	83.3333	64	62	62	62.6667	70	62	67	66.3333	64	62	66	64	67	64	66	65.6667	22	28	28	26	22	28	26	25.3333	22	22	22	22	20	25	25	23.3333	36
18_1	76	72	80	76	75	75	75	75	72	78	78	76	73	77	77	75.6667	68	72	76	72	71	72	74	72.3333	68	68	66	67.3333	70	73	74	72.3333	24	22	24	23.3333	22	22	22	22	20	20	20	20	21	20	20	20.3333	54
18_2	72	72	80	74.6667	75	78	81	78	74	75	74	74.3333	72	79	78	76.3333	72	74	72	72.6667	71	70	74	71.6667	62	62	62	62	65	63	63	63.6667	20	22	18	20	21	22	22	21.6667	16	18	20	18	19	19	23	20.3333	46
19_1	100	102	102	101.333	106	105	103	104.667	100	110	110	106.667	105	106	106	105.667	70	68	72	70	68	67	68	67.6667	64	62	66	64	66	69	66	67	33	34	36	34.3333	36	34	36	35.3333	36	38	38	37.3333	33	36	36	35	58
19_2	100	106	101	102.333	103	103	103	103	110	108	108	108.667	105	108	102	105	66	68	70	68	68	68	70	68.6667	68	72	72	70.6667	68	70	70	69.3333	34	34	34	34	36	36	36	36	32	32	34	32.6667	33	36	34	34.3333	56
20_1	76	78	75	76.3333	80	82	84	82	86	86	82	84.6667	82	82	82	82	76	76	78	76.6667	76	76	76	76	78	78	78	78	75	75	75	75	26	26	26	26	28	33	30	30.3333	24	24	26	24.6667	26	27	28	27	48
20_2	80	85	85	83.3333	80	81	82	81	82	84	86	84	81	80	85	82	82	84	86	84	78	81	83	80.6667	80	80	80	80	83	86	76	81.6667	32	30	32	31.3333	35	35	35	35	30	30	30	30	33	31	31	31.6667	60
21_1	80	86	82	82.6667	83	86	85	84.6667	82	82	83	82.3333	86	87	85	86	60	62	62	61.3333	57	58	56	57	54	54	52	53.3333	53	53	53	53	28	30	30	29.3333	28	29	28	28.3333	24	24	24	24	24	25	23	24	38
21_2	78	80	82	80	83	83	84	83.3333	80	82	84	82	83	85	85	84.3333	64	64	64	64	61	60	60	60.3333	60	58	60	59.3333	60	59	61	60	18	22	18	19.3333	20	19	18	19	20	18	18	18.6667	18	20	21	19.6667	44
22_1	84	82	80	82	82	82	83	82.3333	80	84	80	81.3333	83	86	85	84.6667	64	62	64	63.3333	59	61	63	61	54	56	58	56	58	56	58	57.3333	28	30	30	29.3333	28	28	30	28.6667	24	24	24	24	27	25	26	26	38
22_2	76	80	82	79.3333	80	82	84	82	78	76	80	78	80	84	84	82.6667	60	58	62	60	58	56	56	56.6667	64	62	64	63.3333	59	59	60	59.3333	22	20	24	22	20	24	24	22.6667	24	24	24	24	23	24	26	24.3333	36
23_1	72	74	70	72	72	72	75	73	80	82	80	80.6667	78	79	82	79.6667	66	70	72	69.3333	66	70	70	68.6667	72	72	74	72.6667	69	70	69	69.3333	28	28	30	28.6667	29	28	30	29	30	32	34	32	26	34	35	31.6667	32
23_2	68	70	72	70	68	66	68	67.3333	66	68	68	67.3333	68	64	68	66.6667	64	70	66	66.6667	68	66	68	67.3333	68	64	68	66.6667	68	65	71	68	32	30	34	32	29	28	31	29.3333	30	30	30	30	28	29	30	29	42
24_1	84	82	82	82.6667	87	86	87	86.6667	76	82	86	81.3333	85	85	85	85	70	72	70	70.6667	72	72	73	72.3333	66	70	75	70.3333	71	71	70	70.6667	20	22	20	20.6667	22	20	20	20.6667	20	20	20	20	21	21	21	21	32
24_2	80	80	84	81.3333	84	84	87	85	84	80	82	82	87	88	84	86.3333	66	62	60	62.6667	69	67	68	68	60	58	60	59.3333	66	63	59	62.6667	22	24	24	23.3333	22	22	21	21.6667	18	20	22	20	20	24	24	22.6667	34
25_1	78	80	88	82	83	83	85	83.6667	84	84	84	84	87	88	88	87.6667	80	87	86	84.3333	85	83	84	84	74	70	74	72.6667	69	66	73	69.3333	26	22	28	25.3333	20	20	28	22.6667	24	20	22	22	18	20	19	19	44
25_2	70	72	70	70.6667	67	70	70	69	70	70	70	70	70	71	70	70.3333	60	64	64	62.6667	60	62	66	62.6667	60	62	62	61.3333	60	61	60	60.3333	18	18	20	18.6667	18	18	20	18.6667	18	18	20	18.6667	18	18	18	18	34
26_1	66	68	68	67.3333	70	66	67	67.6667	68	68	68	68	67	68	68	67.6667	68	70	68	68.6667	68	68	70	68.6667	68	72	70	70	66	68	69	67.6667	16	16	18	16.6667	18	18	18	18	17	17	18	17.3333	18	17	17	17.3333	40
26_2	75	74	76	75	75	72	73	73.3333	72	72	74	72.6667	72	73	75	73.3333	66	64	66	65.3333	68	64	64	65.3333	66	66	66	66	66	66	66	66	14	16	14	14.6667	17	18	16	17	14	16	16	15.3333	17	19	20	18.6667	36
27_1	92	90	92	91.3333	90	92	92	91.3333	90	88	90	89.3333	90	92	90	90.6667	74	74	78	75.3333	76	76	76	76	80	78	78	78.6667	78	76	76	76.6667	24	26	28	26	26	26	26	26	22	24	26	24	20	28	28	25.3333	50
27_2	104	103	100	102.333	90	105	105	100	104	106	104	104.667	105	105	105	105	82	82	75	79.6667	80	81	81	80.6667	80	84	84	82.6667	75	80	80	78.3333	36	38	36	36.6667	38	37	38	37.6667	34	34	34	34	36	37	36	36.3333	46
28_1	90	94	96	93.3333	93	94	94	93.6667	98	108	108	104.667	96	96	96	96	63	50	63	58.6667	63	62	58	61	60	60	58	59.3333	58	58	57	57.6667	28	26	28	27.3333	32	32	35	33	30	32	32	31.3333	33	38	30	33.6667	44
28_2	96	94	96	95.3333	96	98	98	97.3333	100	103	104	102.333	98	94	98	96.6667	63	65	70	66	63	62	62	62.3333	54	54	58	55.3333	58	61	60	59.6667	30	32	30	30.6667	32	32	32	32	30	30	32	30.6667	32	32	35	33	44
29_1	86	88	90	88	87	87	93	89	96	92	96	94.6667	95	97	100	97.3333	76	78	76	76.6667	72	75	75	74	72	70	74	72	74	74	74	74	30	32	30	30.6667	30	32	32	31.3333	30	34	34	32.6667	33	33	33	33	36
29_2	92	90	94	92	90	92	91	91	92	92	92	92	90	90	90	90	68	68	68	68	66	68	68	67.3333	70	70	72	70.6667	73	72	70	71.6667	24	24	24	24	23	18	20	20.3333	24	26	28	26	20	20	26	22	38
[truncated: 15 more columns]

## Sheet: Análisis 0 parciales
	Media_Flex_A_G	Media_Flex_A_S	DIF (G/S) A	Media_Flex_B_G	Media_Flex_B_S	DIF (G/S) B	DIF (G) A/B	DIF (S) A/B	Media_Supi_A_G	Media_Supi_A_S	DIF (G/S) A	Media_Supi_B_G	Media_Supi_B_S	DIF (G/S) B	DIF (G) A/B	DIF (S) A/B	Media_Prono_A_G	Media_Prono_A_S	DIF (G/S) A	Media_Prono_B_G	Media_Prono_B_S	DIF (G/S) B	DIF (G) A/B	DIF (S) A/B
1	69.3889	70.9444	1.55556	67.1389	60.1389	7	2.25	10.8056	49.7778			29.0556	48.6667	19.6111	20.7222		47.3056
2	78.3333	76.0278	2.30556	68.6389	60.8056	7.83333	9.69444	15.2222	42.8056	23.5833	19.2222	24.6111	33.1389	8.52778	18.1944	9.55556	33.5278	33.5	0.0277778
3	89.25	87.3889	1.86111	72.0556	67.0833	4.97222	17.1944	20.3056	59.1667	37.6667	21.5	36.6667	44.6111	7.94444	22.5	6.94444	48.0556	46	2.05556
4	85.3333	86.6389	1.30556	87.5833	84.2222	3.36111	2.25	2.41667	68.3333	29.3333	39	29.4444	58.8889	29.4444	38.8889	29.5556	49.8611
5	81.6389	80.8611	0.777778	70.1389	63.6111	6.52778	11.5	17.25	50.3889	25	25.3889	22.8889	44.2778	21.3889	27.5	19.2778	41.7778	41.8333	0.0555556
6	88.2222	89.5	1.27778	81.2778	73.9167	7.36111	6.94444	15.5833	59.5556	36	23.5556	36.7778	54.1111	17.3333	22.7778	18.1111	54.0556	55.3333	1.27778
7	67.6389	67.3611	0.277778	65.25	59.9722	5.27778	2.38889	7.38889	46.5833	28.6667	17.9167	29.5556	34.3611	4.80556	17.0278	5.69444	35.1389	34.8333	0.305556
8	95.4167	90.8611	4.55556	74.6667	68.0833	6.58333	20.75	22.7778	53.5556	25.2778	28.2778	22.8333	43.2778	20.4444	30.7222	18	40.5833	39.8333	0.75
9	81.3611	81.5	0.138889	72.1944	64	8.19444	9.16667	17.5	53.3333	30.9444	22.3889	31.1111	38.3333	7.22222	22.2222	7.38889	35.6667	36.8333	1.16667
10	88.6667	90.5833	1.91667	71.9722	60.1667	11.8056	16.6944	30.4167	52.7222	33.8056	18.9167	32.0278	47.9722	15.9444	20.6944	14.1667	50.2778	49.3333	0.944444
11	88.8333	86.8889	1.94444	87.9722	85.1667	2.80556	0.861111	1.72222	63.2778	22.2778	41	25.2778	38.3056	13.0278	38	16.0278	39.2778	40.3333	1.05556
12	67.6111	62.6944	4.91667	58.3056	54.4167	3.88889	9.30556	8.27778	48.3333	34.5	13.8333	32.2778	36.1111	3.83333	16.0556	1.61111	30.25	31.1667	0.916667
13
14	56	57.2778	1.27778	51.8333	50.0833	1.75	4.16667	7.19444	41	17.4722	23.5278	19	31.9722	12.9722	22	14.5	31.4444	31.1667	0.277778
15	84.3889	83.5	0.888889	75.8611	70.8056	5.05556	8.52778	12.6944	59.7778	30.5556	29.2222	33.2222	47.6944	14.4722	26.5556	17.1389	43.8611	44.3333	0.472222
16	81.5278	83.8889	2.36111	71.5	64.4722	7.02778	10.0278	19.4167	51.3333	19	32.3333	18.1111	39.75	21.6389	33.2222	20.75	38.0278	35.1667	2.86111
17	90.8889	90.2222	0.666667	69.9444	60.75	9.19444	20.9444	29.4722	44.5833	17.2778	27.3056	17.0909	43.3611	26.2702	27.4924	26.0833	43.0833	45.6667	2.58333
18	83.5	83.0278	0.472222	67.7222	59.5833	8.13889	15.7778	23.4444	46.7778	20.0556	26.7222	18.6667	41.3333	22.6667	28.1111	21.2778	42.3611	41.3333	1.02778

## Sheet: Análisis 0 completos
	Media_Flex_A_G	Media_Flex_A_S	DIF (G/S) A	Media_Flex_B_G	Media_Flex_B_S	DIF (G/S) B	DIF (G) A/B	DIF (S) A/B	Media_Supi_A_G	Media_Supi_A_S	DIF (G/S) A	Media_Supi_B_G	Media_Supi_B_S	DIF (G/S) B	DIF (G) A/B	DIF (S) A/B	Media_Prono_A_G	Media_Prono_A_S	DIF (G/S) A	Media_Prono_B_G	Media_Prono_B_S	DIF (G/S) B	DIF (G) A/B	DIF (S) A/B
1	69.3889	70.9444	1.55556	67.1389	60.1389	7	2.25	10.8056	49.7778			29.0556	48.6667	19.6111	20.7222		47.3056
2	78.3333	76.0278	2.30556	68.6389	60.8056	7.83333	9.69444	15.2222	42.8056	23.5833	19.2222	24.6111	33.1389	8.52778	18.1944	9.55556	33.5278	33.5	0.0277778
3	89.25	87.3889	1.86111	72.0556	67.0833	4.97222	17.1944	20.3056	59.1667	37.6667	21.5	36.6667	44.6111	7.94444	22.5	6.94444	48.0556	46	2.05556
4	85.3333	86.6389	1.30556	87.5833	84.2222	3.36111	2.25	2.41667	68.3333	29.3333	39	29.4444	58.8889	29.4444	38.8889	29.5556	49.8611
5	81.6389	80.8611	0.777778	70.1389	63.6111	6.52778	11.5	17.25	50.3889	25	25.3889	22.8889	44.2778	21.3889	27.5	19.2778	41.7778	41.8333	0.0555556
6	88.2222	89.5	1.27778	81.2778	73.9167	7.36111	6.94444	15.5833	59.5556	36	23.5556	36.7778	54.1111	17.3333	22.7778	18.1111	54.0556	55.3333	1.27778
7	67.6389	67.3611	0.277778	65.25	59.9722	5.27778	2.38889	7.38889	46.5833	28.6667	17.9167	29.5556	34.3611	4.80556	17.0278	5.69444	35.1389	34.8333	0.305556
8	95.4167	90.8611	4.55556	74.6667	68.0833	6.58333	20.75	22.7778	53.5556	25.2778	28.2778	22.8333	43.2778	20.4444	30.7222	18	40.5833	39.8333	0.75
9	81.3611	81.5	0.138889	72.1944	64	8.19444	9.16667	17.5	53.3333	30.9444	22.3889	31.1111	38.3333	7.22222	22.2222	7.38889	35.6667	36.8333	1.16667
10	88.6667	90.5833	1.91667	71.9722	60.1667	11.8056	16.6944	30.4167	52.7222	33.8056	18.9167	32.0278	47.9722	15.9444	20.6944	14.1667	50.2778	49.3333	0.944444
11	88.8333	86.8889	1.94444	87.9722	85.1667	2.80556	0.861111	1.72222	63.2778	22.2778	41	25.2778	38.3056	13.0278	38	16.0278	39.2778	40.3333	1.05556
12	67.6111	62.6944	4.91667	58.3056	54.4167	3.88889	9.30556	8.27778	48.3333	34.5	13.8333	32.2778	36.1111	3.83333	16.0556	1.61111	30.25	31.1667	0.916667
13
14	56	57.2778	1.27778	51.8333	50.0833	1.75	4.16667	7.19444	41	17.4722	23.5278	19	31.9722	12.9722	22	14.5	31.4444	31.1667	0.277778
15	84.3889	83.5	0.888889	75.8611	70.8056	5.05556	8.52778	12.6944	59.7778	30.5556	29.2222	33.2222	47.6944	14.4722	26.5556	17.1389	43.8611	44.3333	0.472222
16	81.5278	83.8889	2.36111	71.5	64.4722	7.02778	10.0278	19.4167	51.3333	19	32.3333	18.1111	39.75	21.6389	33.2222	20.75	38.0278	35.1667	2.86111
17	90.8889	90.2222	0.666667	69.9444	60.75	9.19444	20.9444	29.4722	44.5833	17.2778	27.3056	17.0909	43.3611	26.2702	27.4924	26.0833	43.0833	45.6667	2.58333
18	83.5	83.0278	0.472222	67.7222	59.5833	8.13889	15.7778	23.4444	46.7778	20.0556	26.7222	18.6667	41.3333	22.6667	28.1111	21.2778	42.3611	41.3333	1.02778
